# Supplementary material
Source: PubMed Central journal article supplement (PMC4298174)

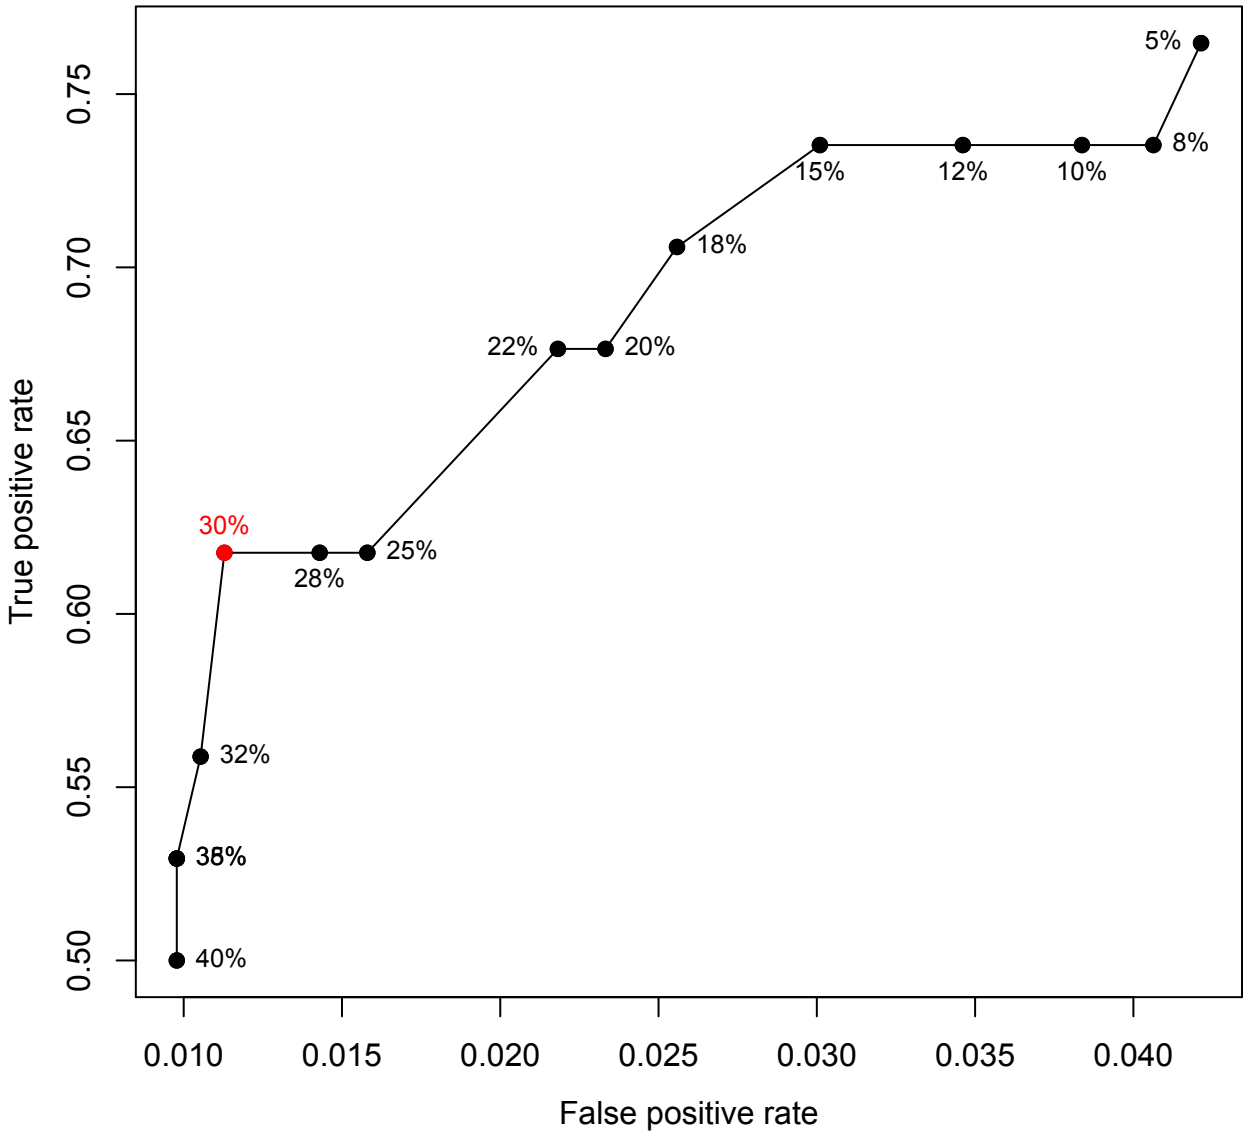

Supplement: supp_msu314_FigS1.pdf [file supp_msu314_FigS1.pdf]
